# Supplementary material for: Childhood Maltreatment Predicts Unfavorable Course of Illness and Treatment Outcome in Depression: A Meta-Analysis
Source: Atypon-hosted journal article supplement (doi:10.1176/appi.ajp.2011.11020335), 2011-08-14
Supplement: appi.ajp.2011.11020335.ds001.pdf [file appi.ajp.2011.11020335.ds001.pdf]

**TABLE S1.** Quality assessment of the included case-control studies with the Newcastle-Ottawa Scale

| Source           | Independent validation of cases (1) | Cases appropriately selected (2) | Cases and controls from same population | Statement that controls have no history of outcome | Comparability (matching or adjusting for one variable) | Comparability (matching or adjusting for two or more variables) | Ascertain exposure by structured interview | Same method to ascertain cases & controls | Same response rate for both groups |
|------------------|-------------------------------------|----------------------------------|-----------------------------------------|----------------------------------------------------|--------------------------------------------------------|-----------------------------------------------------------------|--------------------------------------------|-------------------------------------------|------------------------------------|
| Kessler, 1993    |                                     | √                                | √                                       | √                                                  | √                                                      | √                                                               |                                            | √                                         |                                    |
| Brown, 1994a     | √                                   |                                  | √                                       |                                                    |                                                        |                                                                 | √                                          | √                                         |                                    |
| Brown, 1994b     | √                                   |                                  | √                                       |                                                    |                                                        |                                                                 | √                                          | √                                         |                                    |
| Zlotnick, 1995   | √                                   |                                  | √                                       |                                                    |                                                        |                                                                 |                                            | √                                         |                                    |
| Kessler, 1997    |                                     | √                                | √                                       | √                                                  | √                                                      | √                                                               |                                            | √                                         |                                    |
| Bernet, 1999     |                                     | √                                |                                         | √                                                  |                                                        |                                                                 |                                            | √                                         |                                    |
| Hayden, 2001     | √                                   |                                  | √                                       |                                                    | √                                                      |                                                                 | √                                          | √                                         |                                    |
| Wainwright, 2002 |                                     | √                                | √                                       | √                                                  |                                                        |                                                                 |                                            | √                                         |                                    |
| Brown, 2007      |                                     |                                  | √                                       |                                                    |                                                        |                                                                 | √                                          | √                                         |                                    |
| Ritchie, 2009    | √                                   | √                                | √                                       |                                                    |                                                        |                                                                 |                                            | √                                         |                                    |
| Wiersma, 2009    |                                     | √                                | √                                       |                                                    | √                                                      | √                                                               | √                                          | √                                         |                                    |
| Angst, 2010      |                                     | √                                | √                                       |                                                    |                                                        |                                                                 |                                            | √                                         |                                    |
| McLaughlin, 2010 |                                     | √                                | √                                       |                                                    | √                                                      | √                                                               |                                            | √                                         |                                    |
| Suija, 2010      |                                     | √                                | √                                       |                                                    |                                                        |                                                                 | √                                          | √                                         |                                    |

(1) prospective assessment of recurrence or persistence

(2) all, consecutive, or randomly-selected cases

**TABLE S2.** Quality assessment of the included cohort studies with the Newcastle-Ottawa Scale

| Source          | Exposed group represent average in community | Ascertain exposure through records or structured interviews | Exposed & non-exposed from same population | Demonstration that outcome not present at study start | Comparability (matching or adjusting for one variable) | Comparability (matching or adjusting for two or more variables) | Independent validation of outcome (1) | Follow-up long enough for outcome to occur (i.e., 10 years) | Loss to follow-up <20% |
|-----------------|----------------------------------------------|-------------------------------------------------------------|--------------------------------------------|-------------------------------------------------------|--------------------------------------------------------|-----------------------------------------------------------------|---------------------------------------|-------------------------------------------------------------|------------------------|
| Collishaw, 2007 | √                                            | √                                                           | √                                          | √                                                     | √                                                      |                                                                 |                                       | √                                                           | √                      |
| Danese, 2008    | √                                            | √                                                           | √                                          | √                                                     | √                                                      | √                                                               | √                                     | √                                                           | √                      |

(1) prospective assessment of recurrence or persistence

**TABLE S3.** Quality assessment of the included clinical trials

| Source          | Randomization (1) | Dropouts accounted for (1) | Outcome rater blind to maltreatment status (1) (2) | Ascertain exposure by structured interview | Maltreatment assessed prior to outcome | Comparability (matching or adjusting for one variable) | Comparability (matching or adjusting for two or more variables) |
|-----------------|-------------------|----------------------------|----------------------------------------------------|--------------------------------------------|----------------------------------------|--------------------------------------------------------|-----------------------------------------------------------------|
| Sakado, 1999    |                   | √                          | √                                                  |                                            |                                        |                                                        |                                                                 |
| Nemeroff, 2003  | √                 | √                          | √                                                  | √                                          | √                                      | √                                                      | √                                                               |
| Barbe, 2004     | √                 | √                          |                                                    |                                            | √                                      | √                                                      | √                                                               |
| Enns, 2005      |                   | √                          |                                                    |                                            | √                                      |                                                        |                                                                 |
| Asarnow, 2009   | √                 | √                          | √                                                  |                                            | √                                      | √                                                      | √                                                               |
| Johnstone, 2009 | √                 | √                          |                                                    |                                            | √                                      | √                                                      | √                                                               |
| Klein, 2009     |                   | √                          |                                                    |                                            | √                                      | √                                                      | √                                                               |
| Shirk, 2009     |                   | √                          | √                                                  |                                            | √                                      |                                                        |                                                                 |
| Lewis, 2010     | √                 | √                          | √                                                  | √                                          | √                                      |                                                        |                                                                 |
| Miniati, 2010   | √                 |                            |                                                    |                                            | √                                      | √                                                      | √                                                               |

(1) adapted Jadad scale

(2) Based on availability of blinding statement (because the contrast of interest was between maltreated and non-maltreated individuals within the same active treatment arm, we considered blinding to maltreatment status rather than to treatment)
